# Supplementary figures and images for: A highly dispersed magnetic polymetallic catalyst to activate peroxymonosulfate for the degradation of organic pollutants in wastewater
Source: Royal Society of Chemistry journal article supplement (doi:10.1039/d2en00294a), 2022-01-01

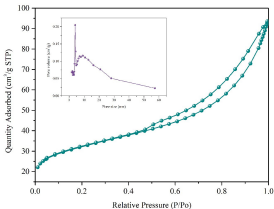

Supplement: d2en00294a2.pdf [file d2en00294a2.pdf]

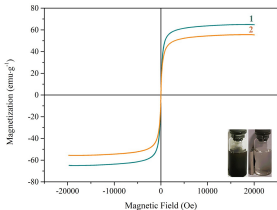

Supplement: d2en00294a3.pdf [file d2en00294a3.pdf]

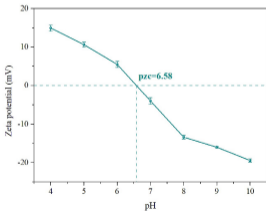

Supplement: d2en00294a4.pdf [file d2en00294a4.pdf]
